# Supplementary material
Source: MDPI journal article supplement (https://www.mdpi.com/2073-4433/13/12/1952)
Supplement: s1 [file s1]

# Prioritization of VOCs Emitted from Co-Processing Cement Kiln Using a Fuzzy Analytic Hierarchy Process Method

Yong Yang, Guoao Li, Yaling Wang, Zhiping Wang, Bao Jiang, Huahua Bai, Lei Nie, Xue Chen, Xianglong Jing, Guohao Li and Chengyi Sun \*

Laboratory of Urban Atmospheric Volatile Organic Compounds Pollution Control and Application, Beijing Municipal Research Institute of Eco-Environmental Protection, Beijing 100037, China

\* Correspondence: [sunchengyi@cee.cn](mailto:sunchengyi@cee.cn)

## Assumption principles of estimation

### 1. OFP

1. For the compounds in the same category, their *MIR* decrease slightly with the growth of the carbon chain, and regardless of how long the carbon chain is, their *MIR* are still in the same order.
2. Functional groups and degree of unsaturation affect *MIR*. *MIR* reduces with an increase in the number of halogen groups in the organic compounds. Based on the *MIR* values of benzene, chlorin benzene, and 1,3-dichlorobenzene, the value drops roughly 50% when a chlorine group substitutes a hydrogen atom of the aromatic compound.
3. Based on our observation, we found that when the number of halogen groups is more than four in one compound, the *MIR* of the target compound is estimated as the value of 0 g O<sub>3</sub>/g VOCs. When the compound has three halogen groups, its *MIR* is less than 0.1 g O<sub>3</sub>/g VOCs. Notably, the OFP of tetrachloroethylene is 0.031 g O<sub>3</sub>/g VOCs, while the *MIR* of tetrachloromethane is 0 g O<sub>3</sub>/g VOCs. This discrepancy is due to the unsaturated bond in the tetrachloroethylene. The assumed *MIR* are listed in Table S1.

### 2. Odor Threshold

1. Isomerides have a similar odor threshold.
2. For the compounds in the same category, their odor threshold values are similar.
3. Halohydrocarbon has a much higher odor threshold.

The assumed odor threshold values are given in Table S1.

### 3. Saturated Vapor Pressure

Saturated vapor pressure is an important index to evaluate the diffusion of VOCs in multiple phases, and it was used to evaluate the influence ability of different VOCs. The saturated vapor pressure was obtained from the database of the National Institute of Standards and Technology.

The assumption is that compounds with similar structure and isomerides have similar saturated vapor pressure. Based on this assumption, the saturated vapor pressure of trans-1,3-dichloropropenem and cis-1,3-dichloropropene are represented by allyl chloride, which has a similar structure. Bromodichloromethane is represented by trichloromethane. The saturated vapor pressure of methyl t-butyl ether, hexachloro-1,3-butadiene, and methylcyclohexane are represented by their isomerides, which are pentanol, 1,3-Butadiene, and 1-heptene, respectively.

**Table S1.** Database and assumptions; Method: Assumption Principles of Estimation.

| CAS      | Compound               | Average Concentration<br>μg/m <sup>3</sup> | SD<br>μg/m <sup>3</sup> | Odor Threshold<br>mg/m <sup>3</sup> | Reference  | MI<br>g O <sub>3</sub> /g VOCs | Reference  | Saturated Vapor Pressure<br>kPa(25°C) | Reference | LC50, Fish<br>mg/L | Reference | LC50, Mice<br>ppm | Reference | IUR<br>μg/m <sup>3</sup> | Reference | RfC<br>mg/m <sup>3</sup> | Reference |
|----------|------------------------|--------------------------------------------|-------------------------|-------------------------------------|------------|--------------------------------|------------|---------------------------------------|-----------|--------------------|-----------|-------------------|-----------|--------------------------|-----------|--------------------------|-----------|
| 75-28-5  | isobutane              | 10.19                                      | 10.36                   | 3113.70                             | Assumption | 1.23                           | Carter2010 | 348.86                                | NIST      | 29.5               | ECO-SAR   |                   |           |                          |           |                          |           |
| 106-97-8 | n-butane               | 38.70                                      | 45.90                   | 3113.70                             | Nagata2003 | 1.15                           | Carter2010 | 242.81                                | NIST      | 25.4               | ECO-SAR   | 658000            | MSDS      |                          |           |                          |           |
| 78-78-4  | isopentane             | 13.66                                      | 15.37                   | 4.20                                | Nagata2003 | 0.37                           | Carter2010 | 91.76                                 | NIST      | 13.3               | ECO-SAR   | 1000              | MSDS      |                          |           |                          |           |
| 109-66-0 | n-pentane              | 37.51                                      | 44.86                   | 4.50                                | Nagata2003 | 1.31                           | Carter2010 | 68.33                                 | NIST      | 11.4               | ECO-SAR   | 364000            | MSDS      |                          |           |                          |           |
| 75-83-2  | 2,2-dimethylbutane     | 8.10                                       | 9.18                    | 5.80                                | Assumption | 1.17                           | Carter2010 | 42.56                                 | NIST      | 6.21               | ECO-SAR   |                   |           |                          |           |                          |           |
| 79-29-8  | 2,3-dimethylbutane     | 9.97                                       | 6.45                    | 5.80                                | Assumption | 0.97                           | Carter2010 | 31.34                                 | NIST      | 6.69               | ECO-SAR   |                   |           |                          |           |                          |           |
| 107-83-5 | 2-methylpentane        | 10.97                                      | 6.08                    | 5.80                                | Assumption | 1.5                            | Carter2010 | 28.23                                 | NIST      | 5.74               | ECO-SAR   |                   |           |                          |           |                          |           |
| 96-14-0  | 3-methylpentane        | 3.93                                       | 2.15                    | 5.80                                | Assumption | 1.8                            | Carter2010 | 25.31                                 | NIST      | 5.74               | ECO-SAR   |                   |           |                          |           |                          |           |
| 110-54-3 | n-hexane               | 16.22                                      | 14.21                   | 5.80                                | Nagata2003 | 1.24                           | Carter2010 | 20.17                                 | NIST      | 4.93               | ECO-SAR   |                   |           |                          |           | 0.7                      | EPA, IRIS |
| 108-08-7 | 2,4-dimethylpentane    | 10.80                                      | 7.10                    | 3.00                                | Assumption | 1.55                           | Carter2010 | 13.12                                 | NIST      | 2.82               | ECO-SAR   |                   |           |                          |           |                          |           |
| 591-76-4 | 2-methylhexane         | 41.46                                      | 55.25                   | 3.00                                | Assumption | 1.19                           | Carter2010 | 8.79                                  | NIST      | 2.42               | ECO-SAR   |                   |           |                          |           |                          |           |
| 565-59-3 | 2,3-dimethylpentane    | 28.20                                      | 24.77                   | 3.00                                | Assumption | 1.61                           | Carter2010 | 9.18                                  | NIST      | 2.82               | ECO-SAR   |                   |           |                          |           |                          |           |
| 589-34-4 | 3-methylhexane         | 4.72                                       | 3.07                    | 3.00                                | Assumption | 1.61                           | Carter2010 | 8.21                                  | NIST      | 2.42               | ECO-SAR   |                   |           |                          |           |                          |           |
| 540-84-1 | 2,2,4-trimethylpentane | 3.77                                       | 1.85                    | 3.00                                | Assumption | 1.26                           | Carter2010 | 6.58                                  | NIST      | 1.26               | ECO-SAR   |                   |           |                          |           |                          |           |
| 142-82-5 | n-heptane              | 14.63                                      | 6.81                    | 3.00                                | Nagata2003 | 1.07                           | Carter2010 | 6.09                                  | NIST      | 2.08               | ECO-SAR   | 75000             | MSDS      |                          |           |                          |           |
| 565-75-3 | 2,3,4-trimethylpentane | ND                                         | ND                      | 8.67                                | Assumption | 1.03                           | Carter2010 | 3.57                                  | NIST      | 1.35               | ECO-SAR   |                   |           |                          |           |                          |           |

|           |                    |        |        |       |             |      |            |         |      |       |            |        |      |         |          |       |          |  |  |
|-----------|--------------------|--------|--------|-------|-------------|------|------------|---------|------|-------|------------|--------|------|---------|----------|-------|----------|--|--|
| 592-27-8  | 2-methylheptane    | ND     | ND     | 8.67  | Assumption  | 1.07 | Carter2010 | 2.78    | NIST | 0.999 | ECOSAR     |        |      |         |          |       |          |  |  |
| 589-81-1  | 3-methylheptane    | ND     | ND     | 8.67  | Assumption  | 1.24 | Carter2010 | 2.62    | NIST | 0.999 | ECOSAR     |        |      |         |          |       |          |  |  |
| 111-65-9  | n-octane           | 109.08 | 144.52 | 8.67  | Na-gata2003 | 0.9  | Carter2010 | 1.72    | NIST | 0.858 | ECOSAR     |        |      |         |          |       |          |  |  |
| 111-84-2  | n-nonane           | 13.23  | 5.31   | 12.60 | Na-gata2003 | 0.78 | Carter2010 | 0.46    | NIST | 0.349 | ECOSAR     | 16768  | MSDS |         |          |       |          |  |  |
| 1120-21-4 | n-undecane         | 12.12  | 4.38   | 6.07  | Na-gata2003 | 0.61 | Carter2010 | 0.05    | NIST | 0.056 | ECOSAR     |        |      |         |          |       |          |  |  |
| 112-40-3  | n-dodecane         | 41.48  | 15.14  | 0.84  | Na-gata2003 | 0.55 | Carter2010 | 0.02    | NIST | 0.022 | ECOSAR     |        |      |         |          |       |          |  |  |
| 124-18-5  | n-decane           | 1.90   | 1.74   | 3.94  | Na-gata2003 | 0.68 | Carter2010 | 0.12    | NIST | 0.14  | ECOSAR     | 72300  | MSDS |         |          |       |          |  |  |
| 115-07-1  | propene            | 323.17 | 323.47 | 0.68  | Na-gata2003 | 11.6 | Carter2010 | 1155.13 | NIST | 67.2  | ECOSAR     |        |      |         |          |       |          |  |  |
| 106-98-9  | 1-butene           | 109.54 | 121.78 | 0.42  | Na-gata2003 | 9.73 | Carter2010 | 285.24  | NIST | 32.5  | ECOSAR     | 420000 | MSDS |         |          |       |          |  |  |
| 106-99-0  | 1,3-butadiene      | 81.46  | 82.77  | 0.56  | Na-gata2003 | 12.6 | Carter2010 | 281.74  | NIST | 41.5  | ECOSAR     | 285000 | MSDS | 0.00003 | EPA,IRIS | 0.002 | EPA,IRIS |  |  |
| 624-64-6  | trans-2-butene     | 43.72  | 74.47  | 0.42  | Assumption  | 16.1 | Carter2010 | 234.55  | NIST | 38.2  | ECOSAR     |        |      |         |          |       |          |  |  |
| 590-18-1  | cis-2-butene       | 14.43  | 13.29  | 0.42  | Assumption  | 14.2 | Carter2010 | 213.60  | NIST | 38.2  | ECOSAR     |        |      |         |          |       |          |  |  |
| 109-67-1  | 1-pentene          | 80.14  | 80.69  | 0.44  | Na-gata2003 | 7.21 | Carter2010 | 85.03   | NIST | 14.7  | ECOSAR     |        |      |         |          |       |          |  |  |
| 646-04-8  | trans-2-pentene    | 9.62   | 10.42  | 0.15  | Assumption  | 10.5 | Carter2010 | 67.39   | NIST | 17.3  | ECOSAR     |        |      |         |          |       |          |  |  |
| 78-79-5   | isoprene           | 2.31   | 2.30   | 0.15  | Na-gata2003 | 10.6 | Carter2010 | 73.65   | NIST | 16.9  | ECOSAR     | 3400   | MSDS |         |          |       |          |  |  |
| 627-20-3  | cis-2-pentene      | 3.73   | 5.75   | 0.15  | Assumption  | 10.3 | Carter2010 | 65.95   | NIST | 17.3  | ECOSAR     |        |      |         |          |       |          |  |  |
| 592-41-6  | 1-hexene           | 52.39  | 38.78  | 0.53  | Na-gata2003 | 5.49 | Carter2010 | 24.79   | NIST | 6.39  | ECOSAR     | 40000  | MSDS |         |          |       |          |  |  |
| 287-92-3  | cyclopentane       | 3.72   | 1.80   | 10.51 | Assumption  | 1.96 | Carter2010 | 42.32   | NIST | 14    | ECOSAR     | 106000 | MSDS |         |          |       |          |  |  |
| 96-37-7   | methylcyclopentane | 7.00   | 4.07   | 6.39  | Na-gata2003 | 1.7  | Carter2010 | 18.33   | NIST | 7.08  | ECOSAR     |        |      |         |          |       |          |  |  |
| 110-82-7  | cyclohexane        | 9.02   | 3.61   | 10.51 | Na-gata2003 | 1.25 | Carter2010 | 13.01   | NIST | 6.08  | ECOSAR     | 70000  | MSDS |         |          | 6     | EPA,IRIS |  |  |
| 108-87-2  | methylcyclohexane  | 55.61  | 22.11  | 0.66  | Na-gata2003 | 1.7  | Carter2010 | 13.01   | NIST | 2.99  | Assumption | 41500  | MSDS |         |          |       |          |  |  |

|          |                                  |         |             |      |                      |           |                      |       |      |       |             |        |      |               |              |      |              |
|----------|----------------------------------|---------|-------------|------|----------------------|-----------|----------------------|-------|------|-------|-------------|--------|------|---------------|--------------|------|--------------|
| 71-43-2  | benzene                          | 1622.02 | 135<br>4.07 | 9.42 | Na-<br>gata200<br>3  | 0.72      | Carter2<br>010       | 12.16 | NIST | 65.1  | ECO-<br>SAR | 31900  | MSDS | 0.000<br>0022 | EPA,I<br>RIS | 0.03 | EPA,I<br>RIS |
| 108-88-3 | toluene                          | 166.93  | 136.<br>40  | 1.36 | Na-<br>gata200<br>3  | 4         | Carter2<br>010       | 3.79  | NIST | 24.8  | ECO-<br>SAR | 20003  | MSDS |               |              | 5    | EPA,I<br>RIS |
| 108-90-7 | chloro-<br>ben-<br>zene          | 111.56  | 36.0<br>9   | 5.70 | As-<br>sump-<br>tion | 0.32      | Carter2<br>010       | 1.60  | NIST | 24.7  | ECO-<br>SAR |        |      |               |              |      |              |
| 100-41-4 | ethylbe-<br>nzene                | 11.24   | 3.89        | 0.81 | Na-<br>gata200<br>3  | 3.04      | Carter2<br>010       | 1.26  | NIST | 10.3  | ECO-<br>SAR |        |      |               |              | 1    | EPA,I<br>RIS |
| 95-47-6  | o-xylene                         | 10.05   | 3.87        | 1.80 | Na-<br>gata200<br>3  | 7.64      | Carter2<br>010       | 0.88  | NIST | 9.2   | ECO-<br>SAR |        |      |               |              |      |              |
| 100-42-5 | styrene                          | 12.27   | 20.2<br>9   | 0.16 | Na-<br>gata200<br>3  | 1.73      | Carter2<br>010       | 0.87  | NIST | 13.4  | ECO-<br>SAR | 24000  | MSDS |               |              | 1    | EPA,I<br>RIS |
| 98-82-8  | isopro-<br>pyl ben-<br>zene      | 1.81    | 0.26        | 0.05 | Na-<br>gata200<br>3  | 2.52      | Carter2<br>010       | 0.61  | NIST | 4.93  | ECO-<br>SAR | 24700  | MSDS |               |              |      |              |
| 103-65-1 | n-pro-<br>pyl ben-<br>zene       | 3.67    | 1.11        | 0.02 | Na-<br>gata200<br>3  | 2.03      | Carter2<br>010       | 0.45  | NIST | 4.24  | ECO-<br>SAR | 319150 | MSDS |               |              |      |              |
| 620-14-4 | 3-ethyl-<br>toluene              | 3.26    | 1.75        | 0.10 | Na-<br>gata200<br>3  | 7.39      | Carter2<br>010       | 0.39  | NIST | 3.77  | ECO-<br>SAR |        |      |               |              |      |              |
| 622-96-8 | 4-ethyl-<br>toluene              | 1.42    | 0.56        | 0.05 | Na-<br>gata200<br>3  | 4.44      | Carter2<br>010       | 0.39  | NIST | 3.77  | ECO-<br>SAR |        |      |               |              |      |              |
| 108-67-8 | 1,3,5-tri-<br>methylben-<br>zene | 1.63    | 0.50        | 0.91 | Na-<br>gata200<br>3  | 11.7<br>6 | Carter2<br>010       | 0.32  | NIST | 3.36  | ECO-<br>SAR |        |      |               |              | 4    | EPA,I<br>RIS |
| 611-14-3 | 2-ethyl-<br>toluene              | 2.56    | 0.92        | 0.40 | Na-<br>gata200<br>3  | 5.59      | Carter2<br>010       | 0.33  | NIST | 3.77  | ECO-<br>SAR |        |      |               |              |      |              |
| 95-63-6  | 1,2,4-tri-<br>methylben-<br>zene | 9.55    | 3.30        | 0.64 | Na-<br>gata200<br>3  | 8.87      | Carter2<br>010       | 0.27  | NIST | 3.36  | ECO-<br>SAR | 18000  | MSDS |               |              | 8    | EPA,I<br>RIS |
| 541-73-1 | 1,3-di-<br>chlor-<br>benzene     | 2.03    | 0.00        | 5.70 | As-<br>sump-<br>tion | 0.17<br>8 | Carter2<br>010       | 0.27  | NIST | 8.52  | ECO-<br>SAR |        |      |               |              |      |              |
| 106-46-7 | 1,4-di-<br>chlor-<br>benzene     | 5.05    | 0.13        | 5.70 | As-<br>sump-<br>tion | 0.17<br>8 | Carter2<br>010       | 0.24  | NIST | 8.52  | ECO-<br>SAR |        |      |               |              |      |              |
| 526-73-8 | 1,2,3-tri-<br>methylben-<br>zene | 3.29    | 1.44        | 0.64 | As-<br>sump-<br>tion | 11.9<br>7 | Carter2<br>010       | 0.20  | NIST | 3.36  | ECO-<br>SAR |        |      |               |              | 0.06 | EPA,I<br>RIS |
| 100-44-7 | benzyl<br>chloride               | 0.96    | 0.00        | 5.70 | As-<br>sump-<br>tion | 2         | As-<br>sump-<br>tion | 0.16  | NIST | 0.825 | ECO-<br>SAR |        |      |               |              |      |              |
| 141-93-5 | 1,3-di-<br>ethylben-<br>zene     | ND      | ND          | 1.52 | Na-<br>gata200<br>3  | 7.1       | Carter2<br>010       | 0.14  | NIST | 1.53  | ECO-<br>SAR |        |      |               |              |      |              |
| 105-05-5 | 1,4-di-<br>ethylben-<br>zene     | ND      | ND          | 0.01 | Na-<br>gata200<br>3  | 4.43      | Carter2<br>010       | 0.13  | NIST | 1.53  | ECO-<br>SAR |        |      |               |              |      |              |

|            |                            |        |        |        |            |        |            |        |      |      |         |       |            |          |          |          |  |
|------------|----------------------------|--------|--------|--------|------------|--------|------------|--------|------|------|---------|-------|------------|----------|----------|----------|--|
| 95-50-1    | 1,2-dichlorobenzene        | ND     | ND     | 5.70   | Assumption | 0.178  | Carter2010 | 0.19   | NIST | 8.52 | ECO-SAR |       |            |          |          |          |  |
| 120-82-1   | 1,2,4-trichlorobenzene     | ND     | ND     | 5.70   | Assumption | 0.089  | Assumption | 0.06   | NIST | 2.77 | ECO-SAR |       |            |          |          |          |  |
| 91-20-3    | naphthalene                | 253.37 | 504.45 | 9.42   | Assumption | 3.3    | Carter2010 | 0.03   | NIST | 9.39 | ECO-SAR |       |            | 0.003    | EPA,IRIS |          |  |
| 75-71-8    | dichlorodifluoromethane    | 0.60   | 0.22   | 20.25  | Assumption | 0      | Assumption | 641.91 | NIST | 145  | ECO-SAR |       |            |          |          |          |  |
| 1320-37-2  | dichlorotetrafluoroethane  | ND     | ND     | 20.25  | Assumption | 0      | Assumption | 216.96 | NIST | 27.9 | ECO-SAR |       |            |          |          |          |  |
| 74-87-3    | chloromethane              | 498.85 | 483.49 | 20.25  | Assumption | 0.038  | Carter2010 | 575.66 | NIST | 274  | ECO-SAR |       |            | 0.02     | EPA,IRIS |          |  |
| 75-01-4    | vinyl chloride             | 22.33  | 18.61  | 5.70   | Assumption | 2.83   | Carter2010 | 391.51 | NIST | 26.7 | ECO-SAR |       | 0.0000088  | EPA,IRIS | 0.1      | EPA,IRIS |  |
| 74-83-9    | methyl bromide             | 114.86 | 119.60 | 20.25  | Assumption | 0.187  | Carter2010 | 219.51 | NIST | 429  | ECO-SAR | 1540  | MSDS       |          |          |          |  |
| 75-00-3    | chloroethane               | 10.15  | 9.72   | 20.25  | Assumption | 0.29   | Carter2010 | 160.29 | NIST | 127  | ECO-SAR |       |            | 10       | EPA,IRIS |          |  |
| 75-69-4    | trichlorofluoromethane     | 2.05   | 1.85   | 20.25  | Assumption | 0      | Assumption | 106.05 | NIST | 86.5 | ECO-SAR |       |            |          |          |          |  |
| 75-35-4    | vinylidene chloride        | ND     | ND     | 5.70   | Assumption | 1.79   | Carter2010 | 80.03  | NIST | 14.8 | ECO-SAR | 25210 | MSDS       |          |          |          |  |
| 26523-64-8 | trichlorotrifluoroethane   | 0.25   | 0.00   | 20.25  | Assumption | 0      | Assumption | 48.72  | NIST | 160  | ECO-SAR |       |            |          |          |          |  |
| 75-09-2    | dichloromethane            | 12.89  | 9.79   | 606.64 | Nagata2003 | 0.041  | Carter2010 | 57.27  | NIST | 273  | ECO-SAR |       | 0.00000001 | EPA,IRIS | 0.6      | EPA,IRIS |  |
| 156-60-5   | trans-1,2-dichloroethylene | ND     | ND     | 5.70   | Assumption | 1.7    | Carter2010 | 44.37  | NIST | 19.6 | ECO-SAR |       |            |          |          |          |  |
| 75-34-3    | 1,1-dichloroethane         | ND     | ND     | 20.25  | Assumption | 0.069  | Carter2010 | 29.84  | NIST | 134  | ECO-SAR | 16000 | MSDS       |          |          |          |  |
| 156-59-2   | cis-1,2-dichloroethene     | 0.17   | 0.00   | 5.70   | Assumption | 1.7    | Carter2010 | 27.05  | NIST | 19.6 | ECO-SAR |       |            |          |          |          |  |
| 67-66-3    | trichloromethane           | 2.35   | 1.60   | 20.25  | Nagata2003 | 0.022  | Carter2010 | 25.90  | NIST | 264  | ECO-SAR | 47702 | MSDS       | 0.000023 | EPA,IRIS |          |  |
| 71-55-6    | 1,1,1-trichloroethane      | ND     | ND     | 20.25  | Assumption | 0.0049 | Carter2010 | 17.78  | NIST | 26.9 | ECO-SAR | 97920 | MSDS       |          | 7        | EPA,IRIS |  |

|            |                              |         |         |        |                      |       |                      |        |                      |       |         |       |      |            |              |          |              |
|------------|------------------------------|---------|---------|--------|----------------------|-------|----------------------|--------|----------------------|-------|---------|-------|------|------------|--------------|----------|--------------|
| 56-23-5    | tetra-chloro-methane         | 0.76    | 0.26    | 31.59  | Na-gata2003          | 0     | Carter2010           | 15.22  | NIST                 | 50.6  | ECO-SAR | 50400 | MSDS | 0.000006   | EPA,I<br>RIS |          |              |
| 107-06-2   | 1,2-di-chloro-ethane         | 57.31   | 63.30   | 20.25  | As-<br>sump-<br>tion | 0.21  | Carter2010           | 10.49  | NIST                 | 115   | ECO-SAR |       |      |            |              |          |              |
| 79-01-6    | trichlo-roe-thene            | 1.53    | 0.82    | 20.78  | Na-gata2003          | 0.64  | Carter2010           | 9.20   | NIST                 | 9.48  | ECO-SAR |       |      | 0.0000041  | EPA,I<br>RIS | 0.02     | EPA,I<br>RIS |
| 78-87-5    | 1,2-di-chloro-propane        | ND      | ND      | 20.25  | As-<br>sump-<br>tion | 0.29  | Carter2010           | 6.71   | NIST                 | 55.4  | ECO-SAR |       |      |            |              | 0.004    | EPA,I<br>RIS |
| 75-27-4    | bro-mo-di-chloro-methane     | ND      | ND      | 20.25  | As-<br>sump-<br>tion | 0.22  | As-<br>sump-<br>tion | 25.90  | As-<br>sump-<br>tion | 301   | ECO-SAR |       |      |            |              |          |              |
| 10061-02-6 | trans-1,3-di-chloro-propene  | 0.25    | 0.00    | 5.70   | As-<br>sump-<br>tion | 0.03  | Carter2010           | 49.16  | As-<br>sump-<br>tion | 11.8  | ECO-SAR |       |      | 0.000004   | EPA,I<br>RIS | 0.02     | EPA,I<br>RIS |
| 10061-01-5 | cis-1,3-di-chloro-propene    | 0.40    | 0.00    | 5.70   | As-<br>sump-<br>tion | 3.7   | Carter2010           | 49.16  | As-<br>sump-<br>tion | 11.8  | ECO-SAR |       |      | 0.000004   | EPA,I<br>RIS | 0.02     | EPA,I<br>RIS |
| 79-00-5    | 1,1,2-tri-chloro-ethane      | 4.87    | 1.89    | 20.25  | As-<br>sump-<br>tion | 0.086 | Carter2010           | 2.91   | NIST                 | 107   | ECO-SAR |       |      | 0.0000016  | EPA,I<br>RIS |          |              |
| 127-18-4   | tetra-chloro-ethylene        | 0.91    | 0.44    | 5.70   | Na-gata2003          | 0.031 | Carter2010           | 2.48   | NIST                 | 4.27  | ECO-SAR |       |      | 0.00000026 | EPA,I<br>RIS | 0.04     | EPA,I<br>RIS |
| 124-48-1   | di-bromo-mono-chloro-methane | ND      | ND      | 20.25  | As-<br>sump-<br>tion | 0.022 | As-<br>sump-<br>tion | 25.90  | NIST                 | 318   | ECO-SAR |       |      |            |              |          |              |
| 106-93-4   | 1,2-di-bromo-ethane          | ND      | ND      | 20.25  | As-<br>sump-<br>tion | 0.102 | Carter2010           | 1.90   | NIST                 | 151   | ECO-SAR |       |      | 0.000003   | EPA,I<br>RIS | 0.009    | EPA,I<br>RIS |
| 75-25-2    | bromo-form                   | ND      | ND      | 30.00  | Ro-cen1920           | 0.05  | As-<br>sump-<br>tion | 0.72   | NIST                 | 321   | ECO-SAR |       |      | 0.0000011  | EPA,I<br>RIS |          |              |
| 79-34-5    | 1,1,2,2-tetra-chloro-ethane  | ND      | ND      | 20.25  | As-<br>sump-<br>tion | 0     | As-<br>sump-<br>tion | 0.53   | NIST                 | 92.6  | ECO-SAR | 4500  | MSDS |            |              |          |              |
| 87-68-3    | hexa-chloro-1,3-bu-tadiene   | 0.48    | 0.15    | 5.70   | As-<br>sump-<br>tion | 0     | As-<br>sump-<br>tion | 281.74 | As-<br>sump-<br>tion | 0.171 | ECO-SAR |       |      |            |              |          |              |
| 64-17-5    | ethanol                      | ND      | ND      | 1.07   | Na-gata2003          | 1.53  | Carter2010           | 7.87   | NIST                 | 3170  | ECO-SAR |       |      |            |              |          |              |
| 107-02-8   | acrolein                     | 1105.45 | 1343.59 | 0.01   | Na-gata2003          | 7.45  | Carter2010           | 36.67  | NIST                 | 0.123 | ECO-SAR |       |      |            |              | 0.000002 | EPA,I<br>RIS |
| 67-64-1    | acetone                      | 584.24  | 720.14  | 108.90 | Na-gata2003          | 0.36  | Carter2010           | 30.60  | NIST                 | 4850  | ECO-SAR |       |      |            |              |          |              |

|           |                      |       |       |       |             |       |            |       |            |      |         |       |      |      |          |
|-----------|----------------------|-------|-------|-------|-------------|-------|------------|-------|------------|------|---------|-------|------|------|----------|
| 67-63-0   | isopropyl alcohol    | 1.02  | 0.00  | 69.75 | Na-gata2003 | 0.61  | Carter2010 | 5.70  | NIST       | 1740 | ECO-SAR |       |      |      |          |
| 1634-04-4 | methyl t-butyl ether | 0.51  | 0.00  | 0.10  | Assumption  | 0.73  | Carter2010 | 0.29  | Assumption | 236  | ECO-SAR | 85000 | MSDS |      |          |
| 108-05-4  | vinyl acetate        | ND    | ND    | 3.42  | Assumption  | 3.2   | Carter2010 | 15.30 | NIST       | 63.7 | ECO-SAR | 11400 | MSDS | 0.02 | EPA,IRIS |
| 78-93-3   | 2-butanone           | 62.53 | 35.11 | 1.42  | Na-gata2003 | 1.48  | Carter2010 | 12.00 | NIST       | 2180 | ECO-SAR |       |      |      |          |
| 141-78-6  | ethyl acetate        | 33.83 | 21.46 | 3.42  | Na-gata2003 | 0.63  | Carter2010 | 12.62 | NIST       | 54.3 | ECO-SAR |       |      |      |          |
| 109-99-9  | tetrahydrofuran      | 10.86 | 9.71  | 31.87 | Na-gata2003 | 3.22  | Carter2010 | 21.62 | NIST       | 534  | ECO-SAR | 61740 | MSDS | 2    | EPA,IRIS |
| 80-62-6   | methyl methacrylate  | 21.37 | 10.90 | 0.94  | Na-gata2003 | 15.61 | Carter2010 | 4.81  | NIST       | 73.5 | ECO-SAR | 78000 | MSDS |      |          |
| 123-91-1  | 1,4-dioxane          | 19.88 | 2.40  | 3.42  | Assumption  | 2.62  | Carter2010 | 4.98  | NIST       | 8770 | ECO-SAR | 46000 | MSDS |      |          |
| 108-10-1  | 4-methyl-2-pentanone | 3.46  | 1.38  | 0.11  | Assumption  | 3.88  | Carter2010 | 2.62  | NIST       | 463  | ECO-SAR | 32720 | MSDS |      |          |
| 591-78-6  | 2-hexanone           | 14.39 | 4.57  | 0.11  | Na-gata2003 | 3.14  | Carter2010 | 0.51  | NIST       | 398  | ECO-SAR | 8000  | MSDS | 0.03 | EPA,IRIS |
| 75-15-0   | carbon disulfide     | 47.84 | 54.26 | 0.71  | Na-gata2003 | 0.25  | Carter2010 | 48.12 | NIST       | 70.8 | ECO-SAR |       |      | 0.7  | EPA,IRIS |
